# Supplementary material
Source: PubMed Central journal article supplement (PMC5531411)
Supplement: jci-127-89717-s001.pdf [file jci-127-89717-s001.pdf]

## Supplemental Figure Legends

---

**Supplemental Figure 1. Sorting of urine-infiltrating monocytic cells during BCG therapy.** Lin<sup>neg</sup>CD14<sup>+</sup>CD33<sup>+</sup>HLADR<sup>low</sup> (red) and Lin<sup>neg</sup>CD14<sup>+</sup>CD33<sup>+</sup>HLADR<sup>high</sup> (grey) were FACS-sorted from post-BCG urine samples. The panels show overlay of both cell subsets after sorting (purity is indicated) from 1 representative sample out of 7.

**Supplemental Figure 2. Bladder cancer cells and BCG induce monocytic MDSC *in-vitro*.** PBMC from healthy donors (at least five per conditions) were co-cultured for 4 days with Bu68.8 or T24 cells (A), or with BCG at 3 different doses (MOI 0.05, 0.5 and 5) (B) and the effects of *Salmonella enterica* serovar Typhi strain Ty21a and heat-killed BCG (30min at 85°C) were compared to live BCG (MOI=0.5) (C). Graphs show the percentage of M-MDSC (Lin<sup>neg</sup>CD14<sup>+</sup>CD33<sup>+</sup>CD11b<sup>+</sup>HLA-DR<sup>low</sup> cells) in indicated conditions compared to medium only. **One-way ANOVAs followed by Dunnett's (A,B) or Tukey's (C) tests:** \* p<0.05; \*\* p<0.01; \*\*\* p<0.001; \*\*\*\* p<0.0001). (D) PBMCs were co-cultured with indicated cell lines for 4 days; CD14<sup>+</sup> cells were then sorted and subsequently co-cultured with autologous CFSE-labeled T cells (3-day stimulation with anti-CD3/CD28). Proliferation profiles are depicted in histograms of CFSE fluorescence intensity in indicated T-cell populations from 1 representative donor out of 4. Div: % cells with at least one division; PI: Proliferation Index.

**Supplemental Figure 3. Recurrence-free and progression-free survivals.** Recurrence-free (A) and progression-free (B) survivals were assessed using the Kaplan-Meier approach in the cohort of 28 patients receiving BCG therapy (with the first instillation at month 0 and the last at month 1.5). Censored patients are represented by tick marks.

**Supplemental Figure 4. Th1/Th2 profiles of urine-infiltrating CD4 T cells during BCG therapy.** (A-B) CD4 T cells were expanded *ex-vivo* from twelve urine samples from patients with high (T/M<sup>high</sup>, n=6) or low (T/M<sup>low</sup>, n=6) T/MDSC ratio. (A) CXCR3 and CCR6 expression in *ex vivo*-expanded CD4 T cells. (B) Th1 cytokines (IFN- $\gamma$ , IL-2, TNF- $\alpha$ ) and Th2 cytokines (IL-4 and IL-5) were measured in the supernatants of activated *ex vivo*-expanded CD4 T cells from urine samples and a “Th2 versus Th1” score was calculated (see methods section) for each sample. (C) IDO activity as assessed by the Kynurenins-to-Tryptophan (K/T) ratio in urine samples from patients of the T/M<sup>high</sup> (n=9) and T/M<sup>low</sup> (n=9) groups. Two-sided t-tests: \*p<0.05.

**Supplemental Figure 5. Induction of ILC2 by different bacteria.** PBMC from 3 healthy donors were co-cultured with *Salmonella enterica* serovar Typhi strain Ty21a or with heat-killed or live BCG (MOI=1) for 4 days. Graph shows the percentage of ILC2 among ILC. **One-way ANOVA followed by Tukey's test:** \* $p < 0.05$ ; \*\*  $p < 0.01$ ; \*\*\*  $p < 0.001$ .

**Supplemental Figure 6. Expression of CCR4 in peripheral and urine ILC from NMIBC patients and production of PGD2 by tumor cell lines.** (A) *Ex-vivo* expression of CCR4 on peripheral ILC1 ( $\text{Lin}^{\text{neg}}\text{CD127}^+\text{CRTH2}^{\text{neg}}\text{c-Kit}^{\text{neg}}$ ), ILC2 ( $\text{Lin}^{\text{neg}}\text{CD127}^+\text{CRTH2}^+$ ) and ILC3 ( $\text{Lin}^{\text{neg}}\text{CD127}^+\text{CRTH2}^{\text{neg}}\text{c-Kit}^+$ ) from patients with non-muscle invasive bladder cancer (NMIBC;  $n=10$ ) (**one-way ANOVA followed by Tukey's test:** \* $p < 0.05$ ; \*\*\*\*  $p < 0.0001$ ). (B) CCR4 expression in ILCs from 3 urine samples during BCG therapy. (C) Detection of PGD2 in the supernatants of indicated bladder tumor cell lines (biological duplicates) in the presence or absence of 30  $\mu\text{M}$  arachidonic acid (AA) as substrate (dashed line indicates limit of detection).

**Supplemental Figure 7. Phenotypic analysis of IL-13 treated sorted monocytes.** Sorted  $\text{CD14}^+$  cells from PBMC of HD ( $n=4$ ) were cultured for 4 days with or without recombinant IL-13 ( $100\text{ng.mL}^{-1}$ ). (A) Representative FACS-histograms showing HLA-DR expression in indicated conditions. (B) HLA-DR expression density (geometric mean fluorescence intensity, MFI) and frequency of  $\text{HLA-DR}^{\text{low}}$  in  $\text{CD14}^+$  cells. (C) Expression levels of various monocytes/macrophages markers on  $\text{HLA-DR}^{\text{low}}$  and  $\text{HLA-DR}^{\text{high}}$   $\text{CD14}^+$  cells treated or not with IL-13. (D) Relative expression of Arginase-1, iNOS and C/EBP $\beta$  transcripts by qPCR in  $\text{CD14}^+$  cells treated or not with IL-13. (E) Corresponding supernatants were harvested and soluble markers were measured by multiplex assay. Two-sided paired t-tests (B,D,E) or **one-way ANOVAs followed by Tukey's tests** (C). \*  $p < 0.05$ ; \*\*  $p < 0.01$ , \*\*\*\*  $p < 0.0001$ .

Supplemental Figure 1.

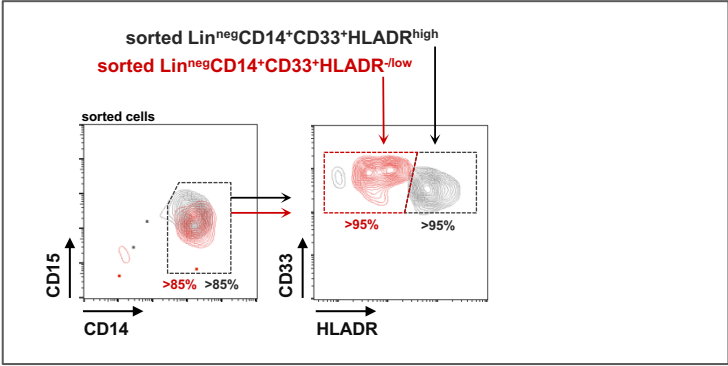

Supplemental Figure 2.

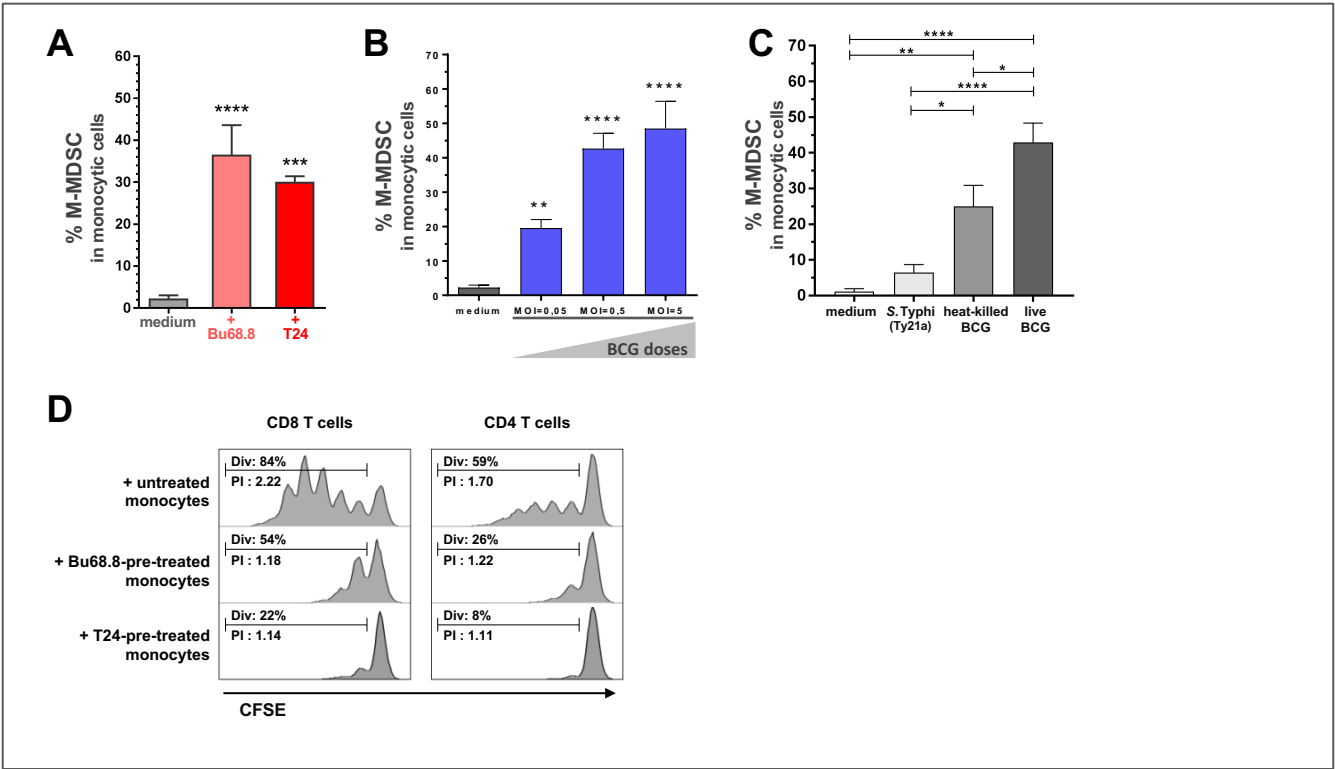

Supplemental Figure 3.

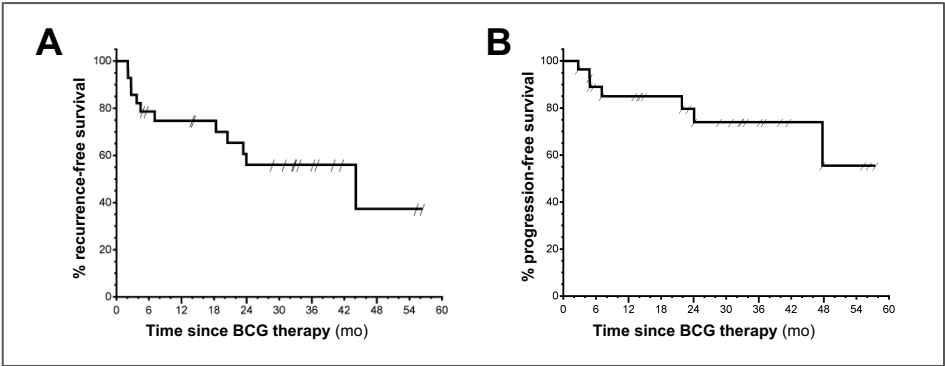

Supplemental Figure 4.

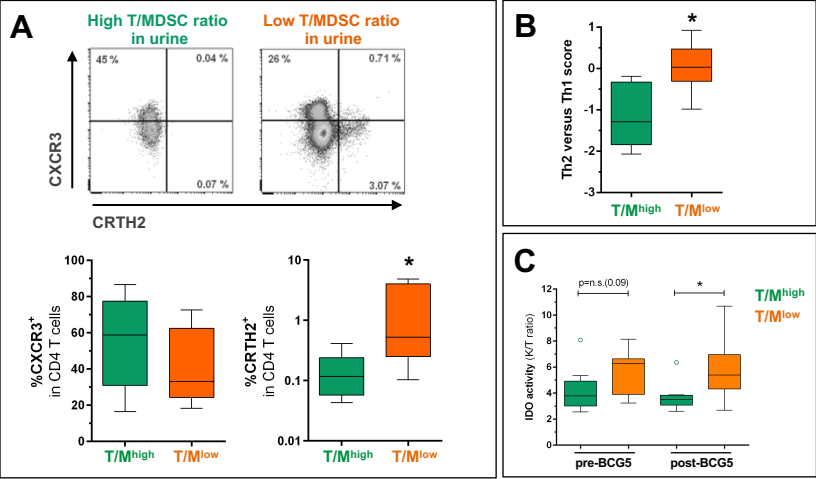

Supplemental Figure 5.

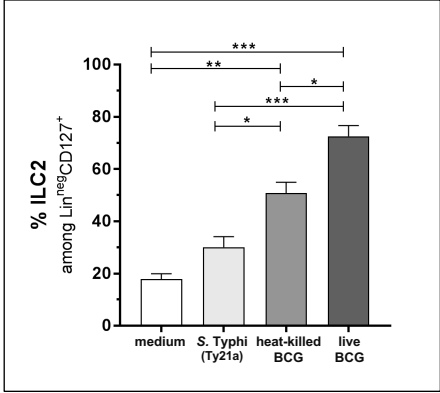

Supplemental Figure 6.

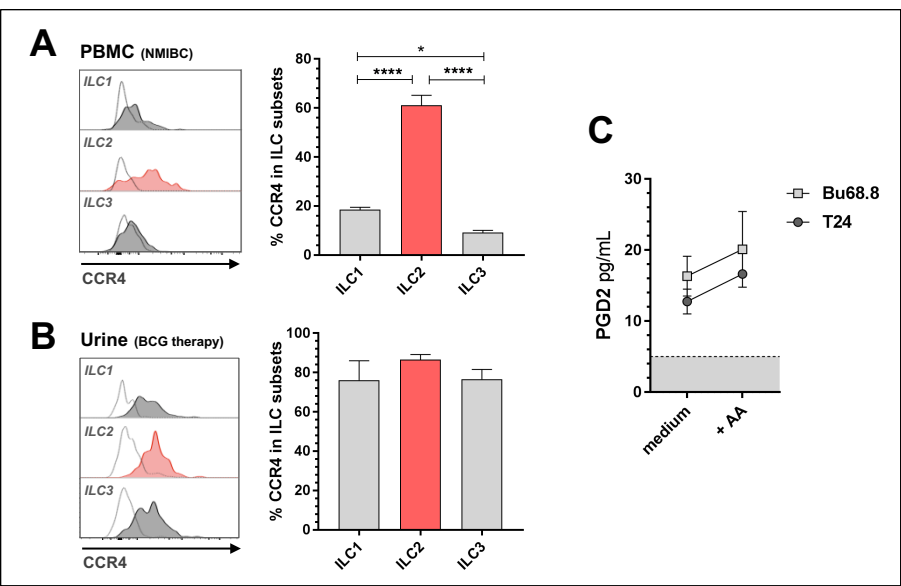

Supplemental Figure 7

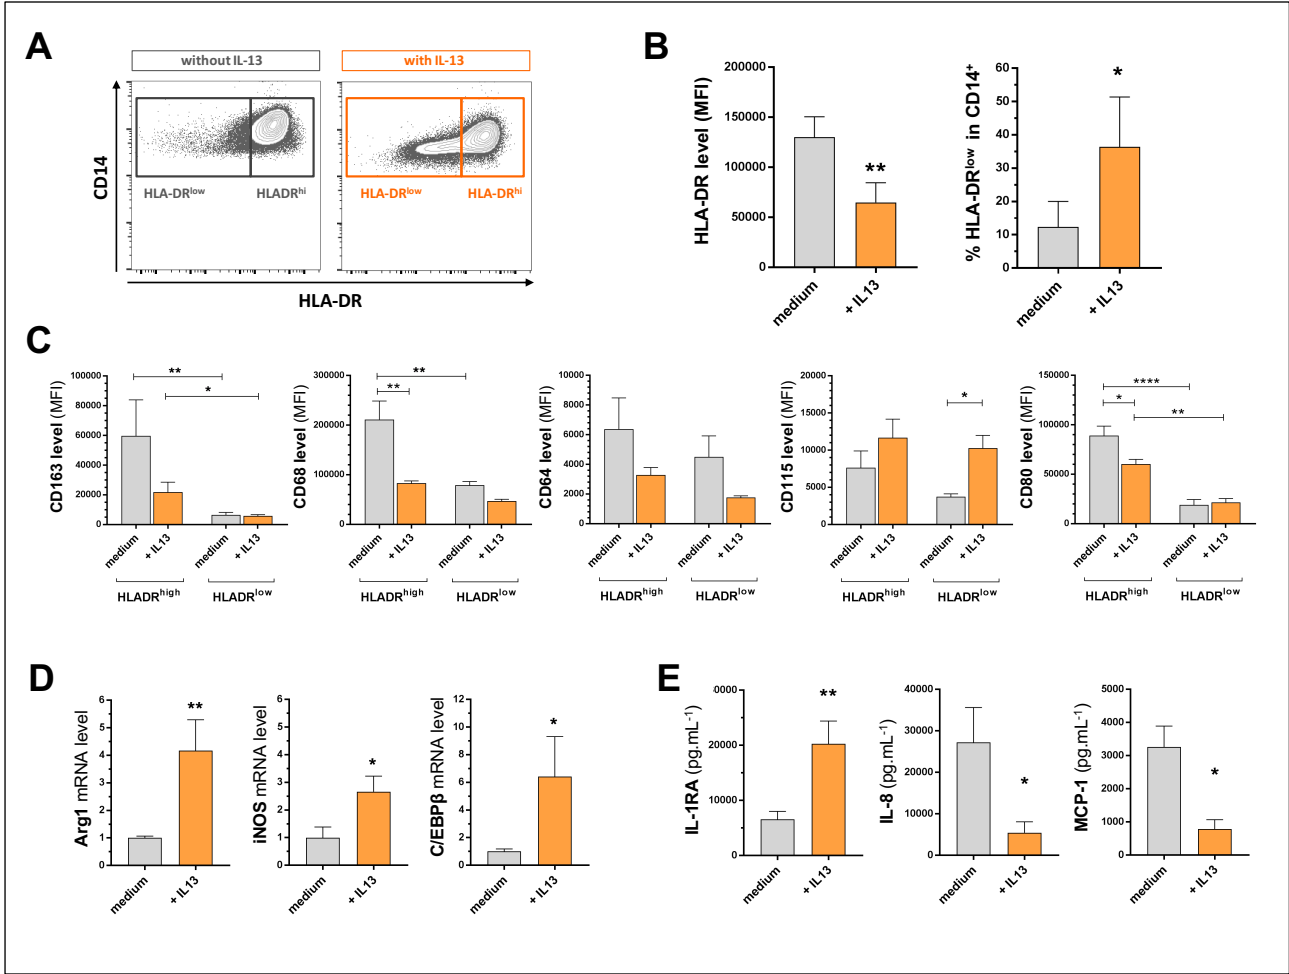

**Supplementary Table 1.** Characteristics of MIBC patients

| Characteristics                          | All patients |
|------------------------------------------|--------------|
| N° of patients                           | 23           |
| Age, yr, median (IQR)                    | 71 (65-805)  |
| <b>Sex, n</b>                            |              |
| Male                                     | 18           |
| Female                                   | 5            |
| <b>Tumor status, n (%)</b>               |              |
| pT2                                      | 6 (26.1)     |
| pT3                                      | 14 (60.9)    |
| pT4                                      | 3 (13)       |
| <b>Draining lymph node status, n (%)</b> |              |
| Nx                                       | 5 (21.7)     |
| N0                                       | 10 (43.5)    |
| N1                                       | 4 (17.4)     |
| N2                                       | 4 (17.4)     |
| <b>Neoadjuvant chemotherapy</b>          | 10 (43.5)    |
